# Supplementary material for: Pore-structure regulation of biomass-derived carbon materials for an enhanced supercapacitor performance
Source: Royal Society of Chemistry journal article supplement (doi:10.1039/d1nr01640g), 2021-01-01
Supplement: d1nr01640g1.pdf [file d1nr01640g1.pdf]

Electronic Supplementary Material (ESI) for Nanoscale.  
This journal is © The Royal Society of Chemistry 2020

## Supporting information

### **Pore Structure Regulation of Biomass-Derived Carbon Materials for Enhanced Supercapacitor Performance**

He Xu<sup>a</sup>, Liyuan Wang<sup>b, \*</sup>, Yi Zhang<sup>a</sup>, Ye Chen<sup>b</sup>, Shuyan Gao<sup>a,b,\*</sup>

<sup>a</sup>.School of Chemistry and Chemical Engineering, Henan Normal University, Xinxiang 453007, PR China.

<sup>b</sup>.School of Materials Science and Engineering, Henan Normal University, Xinxiang, Henan, 453007, PR China. E-mail address: wangliyuan5450@163.com (L. Wang); shuyangao@htu.cn (S. Gao)

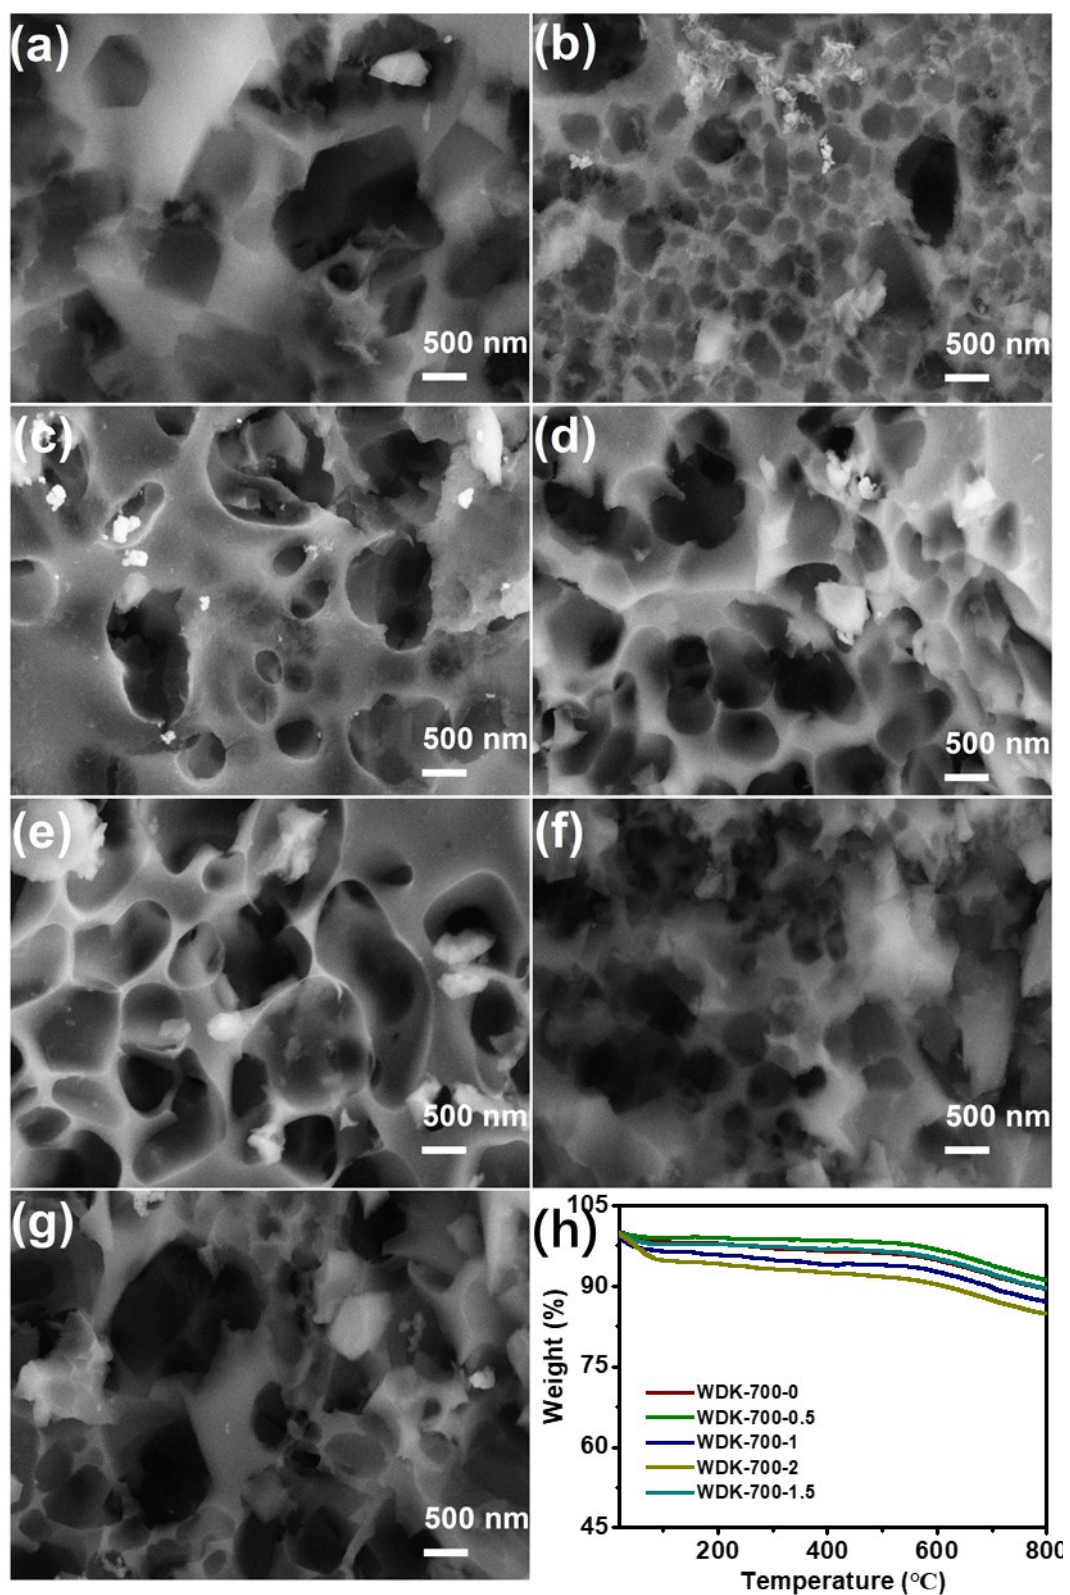

**Fig. S1** SEM images of WDK-700-1 (a), WDK-700-0 (b), WDK-700-0.5 (c), WDK-700-1.5 (d), WDK-700-2 (e), WDK-600-1 (f), WDK-800-1 (g), and TGA curve of samples in N<sub>2</sub> atmosphere (h).

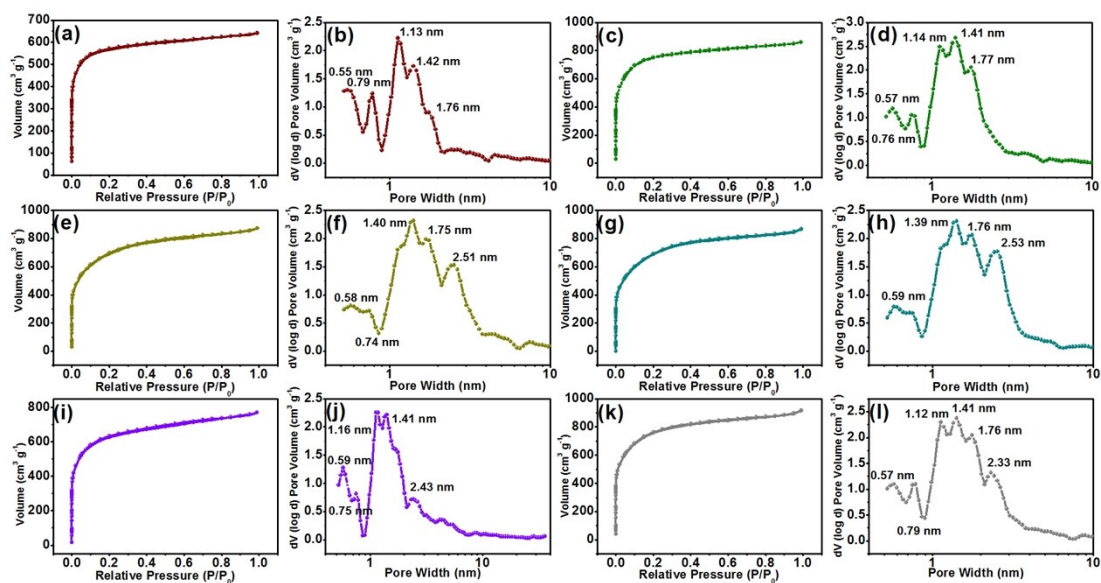

**Fig. S2** (a) N<sub>2</sub> adsorption/desorption curve of WDK-700-0, (b) pore size distribution of WDK-700-0, (c) N<sub>2</sub> adsorption/desorption curve of WDK-700-0.5, (d) pore size distribution of WDK-700-0.5, (e) N<sub>2</sub> adsorption/desorption curve of WDK-700-1.5, (f) pore size distribution of WDK-700-1.5, (g) N<sub>2</sub> adsorption/desorption curve of WDK-700-2, (h) pore size distribution of WDK-700-2, (i) N<sub>2</sub> adsorption/desorption curve of WDK-600-1, (j) pore size distribution of WDK-600-1, (k) N<sub>2</sub> adsorption/desorption curve of WDK-800-1, (l) pore size distribution of WDK-800-1.

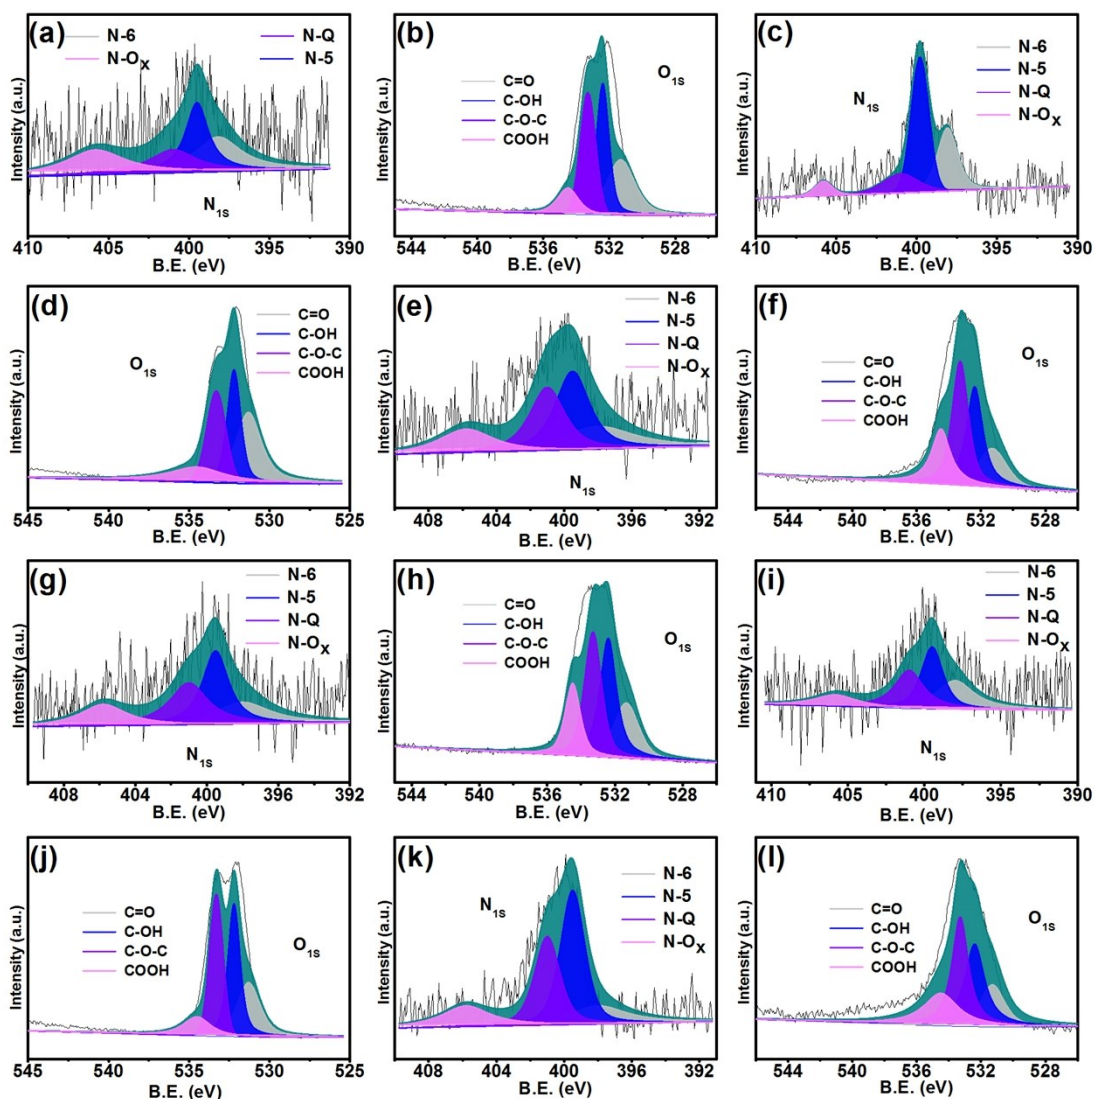

**Fig. S3** (a)  $N_{1s}$  and (b)  $O_{1s}$  high-resolution XPS spectra of WDK-700-0 with deconvoluted peaks, (c)  $N_{1s}$  and (d)  $O_{1s}$  high-resolution XPS spectra of WDK-700-0.5 with deconvoluted peaks, (e)  $N_{1s}$  and (f)  $O_{1s}$  high-resolution XPS spectra of WDK-700-1.5 with deconvoluted peaks, (g)  $N_{1s}$  and (h)  $O_{1s}$  high-resolution XPS spectra of WDK-700-2 with deconvoluted peaks, (i)  $N_{1s}$  and (j)  $O_{1s}$  high-resolution XPS spectra of WDK-600-1 with deconvoluted peaks, (k)  $N_{1s}$  and (l)  $O_{1s}$  high-resolution XPS spectra of WDK-800-1 with deconvoluted peaks.

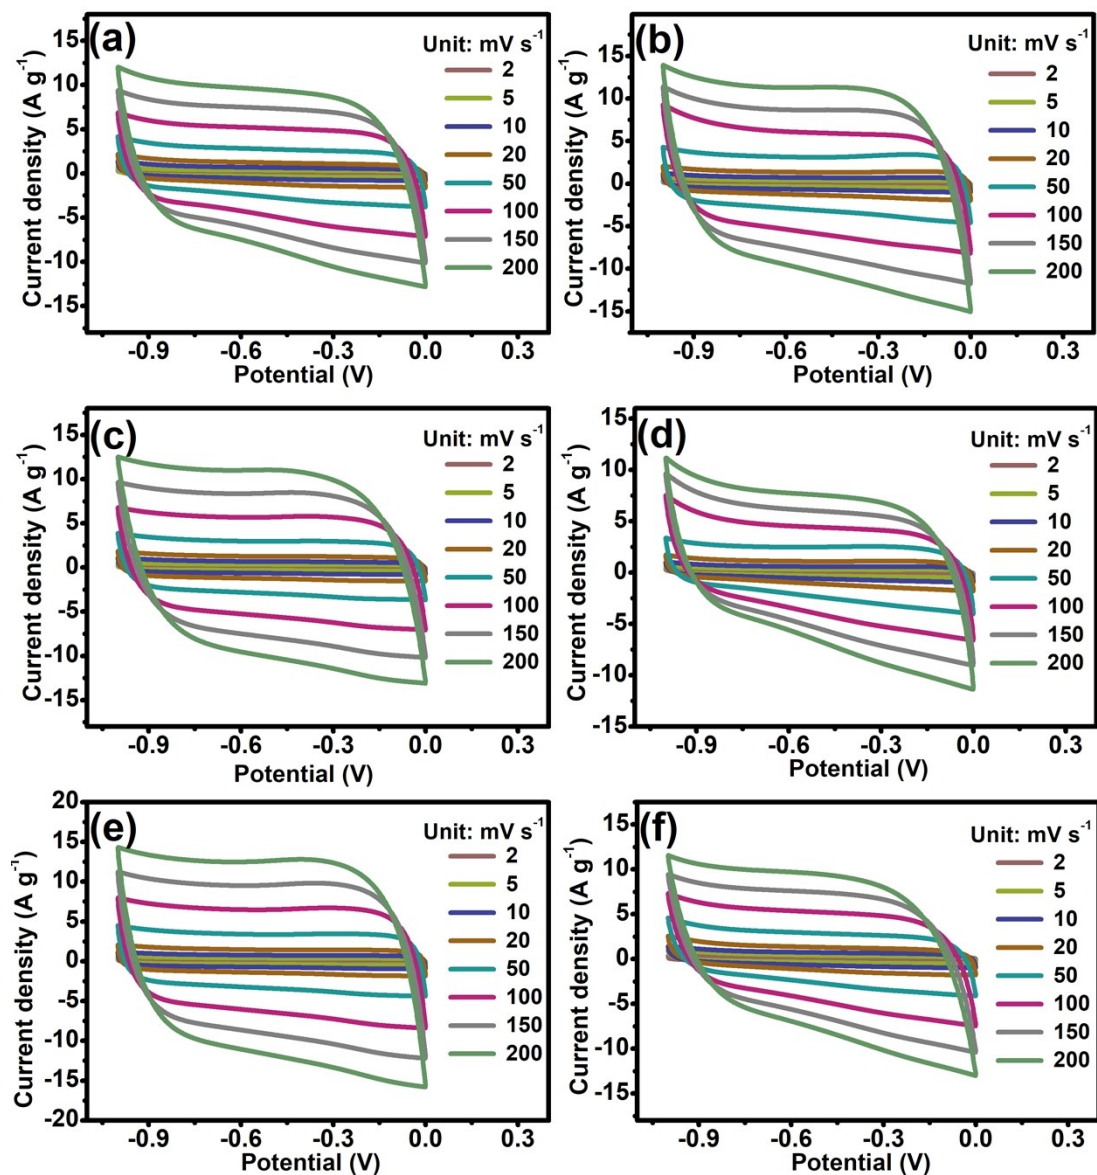

Fig. S4 (a) CV curves of all samples with the different sweep rates: (a) WDK-700-0, (b) WDK-700-0.5, (c) WDK-700-1.5, (d) WDK-700-2, (e) WDK-600-1, (f) WDK-800-1.

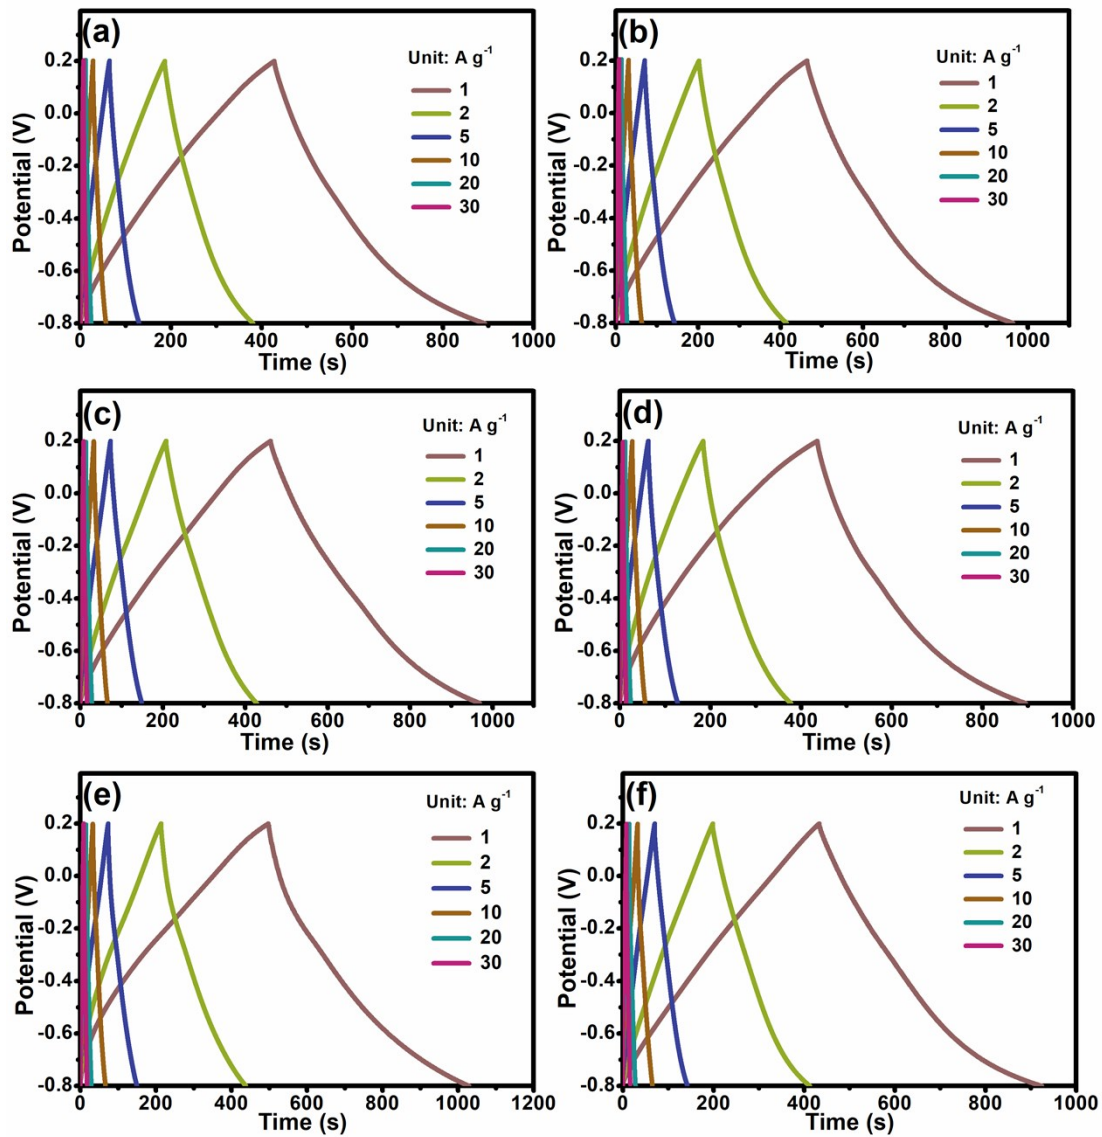

Fig. S5 GCD curves of all samples at various current densities from 1 to 30  $\text{A g}^{-1}$  in 1 mol  $\text{L}^{-1}$   $\text{H}_2\text{SO}_4$  electrolyte with the three-electrode system: (a) WDK-700-0, (b) WDK-700-0.5, (c) WDK-700-1.5, (d) WDK-700-2, (e) WDK-600-1, (f) WDK-800-1.

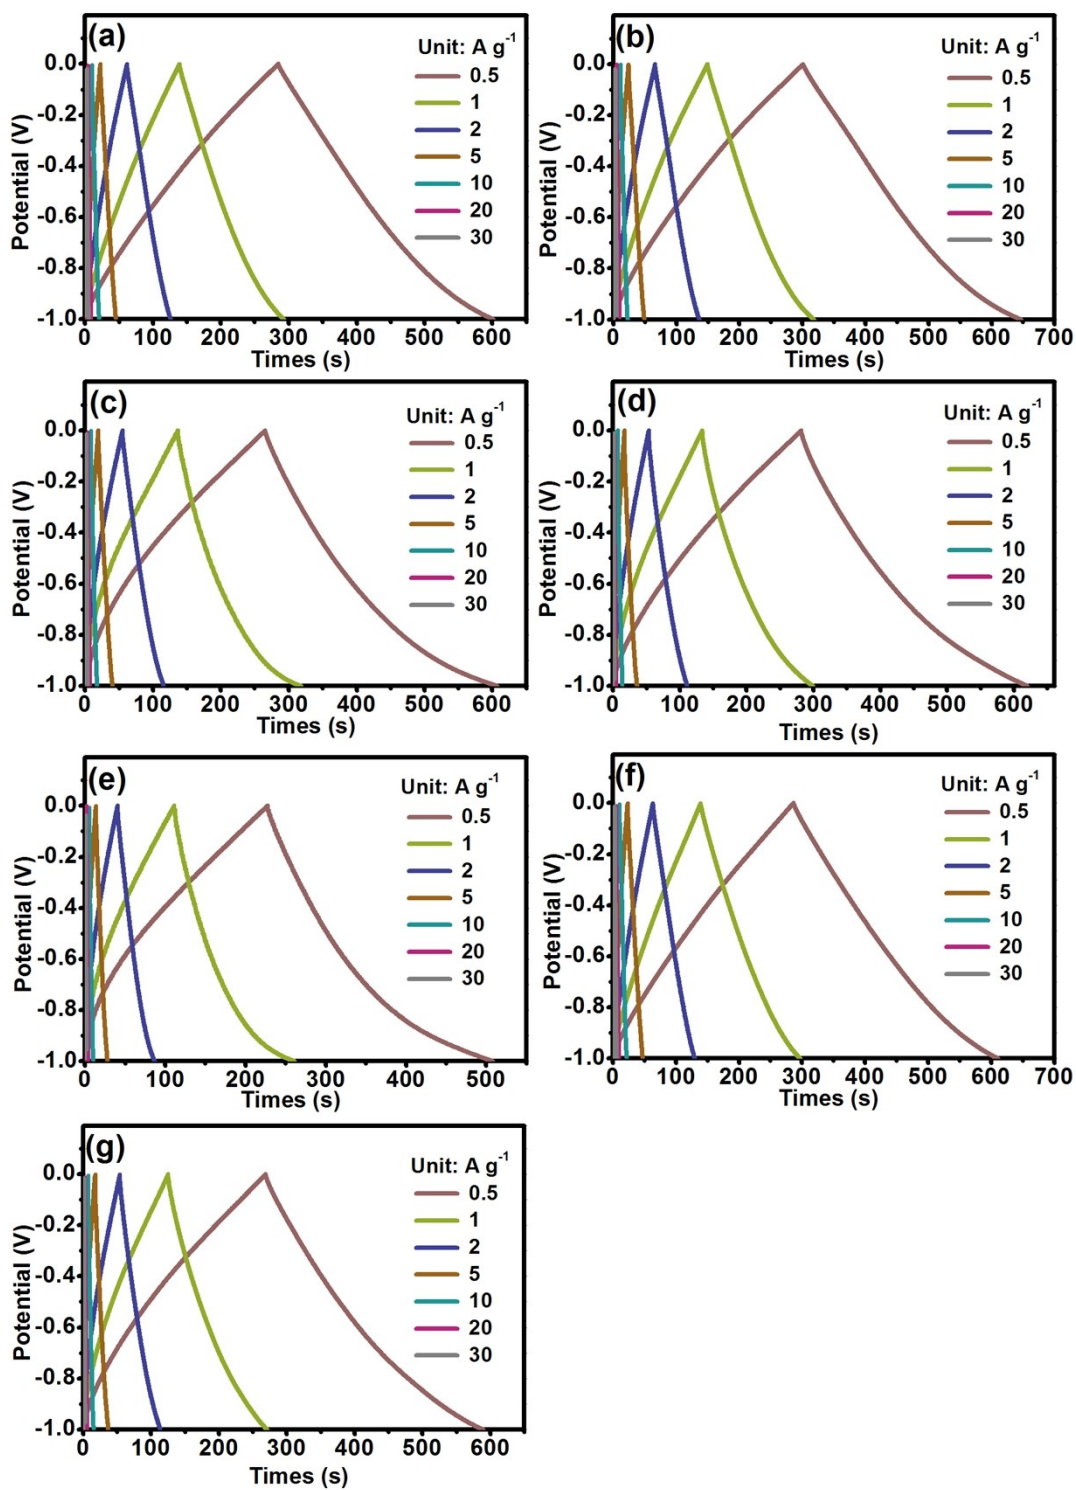

Fig. S6 GCD curves of all samples at various current densities from 1 to 30  $\text{A g}^{-1}$  in 1  $\text{mol L}^{-1}$   $\text{H}_2\text{SO}_4$  electrolyte with the two-electrode system: (a) WDK-700-0, (b) WDK-700-0.5, (c) WDK-700-1, (d) WDK-700-1.5, (e) WDK-700-2, (f) WDK-600-1, (g) WDK-800-1.

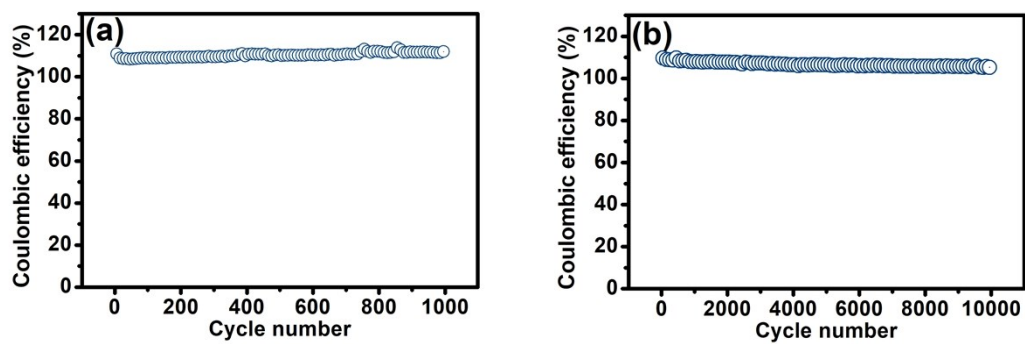

**Fig. S7** Coulombic efficiency of WDK-700-1 electrode at 1 A g<sup>-1</sup> for 1000 cycles (a) and Coulombic efficiency of WDK-700-1 electrode at 30 A g<sup>-1</sup> for 10000 cycles (b)



### The activator mechanism of KOH

Using KOH porogen is one effective way to create the micropores. It is generally believed that the productions in this progress below 700 °C are mainly H<sub>2</sub>, H<sub>2</sub>O, CO, CO<sub>2</sub>, K<sub>2</sub>O, and K<sub>2</sub>CO<sub>3</sub>.<sup>1</sup> This process consists of several simultaneous/continuous reactions as indicated in the following Equations (S1)-(S4). Moreover, at the activation temperature around 400 °C, owing to the dehydration of KOH, K<sub>2</sub>O has been produced (Equation (S1)).<sup>2</sup> Then H<sub>2</sub> and CO<sub>2</sub> could be generated as shown in the Equation (S2) and (S3). Hereafter, the K<sub>2</sub>O and CO<sub>2</sub> can be converted into K<sub>2</sub>CO<sub>3</sub> (Equation (S4)). And the reactions at 570 °C occur by following redox reaction (Equation (S5)):<sup>3</sup>

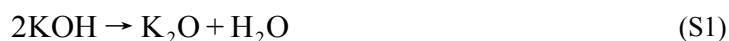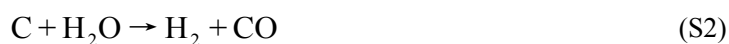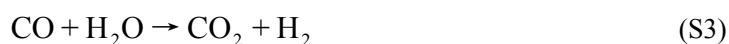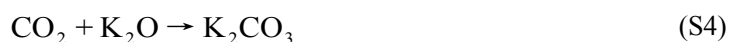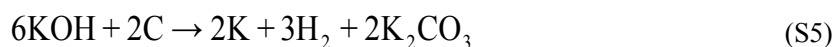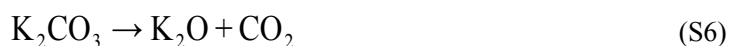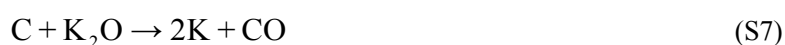

Next, the obtained K<sub>2</sub>CO<sub>3</sub> (Equation (4) and (5)) would be transformed into CO<sub>2</sub> and K<sub>2</sub>O (Equation (6)) at over than 700 °C, and K<sub>2</sub>O could be further reacted with the carbon to produce the metallic K (Equation (7)).<sup>4, 5</sup> Metallic K (Equation (5) and (7)) would intercalate into the carbon structure and expand the lattice leading to the increasing of pore volume. And the escape of H<sub>2</sub>, CO<sub>2</sub>, CO and H<sub>2</sub>O gas from carbon materials as the physical porogens change some micropores into mesopores thus enhancing the porosity.<sup>6</sup> After removing the inserted metallic K and K-containing compounds by the process of hydrochloric acid washing, the expanded carbon lattices cannot be recovered, thus reasonably developing the porosity of the materials.<sup>4, 7</sup>

**Table S1** Detailed quantitative element analysis data.

| Sample      | C <sub>1s</sub> | O <sub>1s</sub> | O <sub>1s</sub> |      |       |      | N <sub>1s</sub> | N <sub>1s</sub> |      |      |                  |
|-------------|-----------------|-----------------|-----------------|------|-------|------|-----------------|-----------------|------|------|------------------|
|             |                 |                 | C=O             | C-OH | C-O-C | COOH |                 | N-6             | N-5  | N-Q  | N-O <sub>x</sub> |
| WDK-700-0   | 80.9            | 17.34           | 0.29            | 0.31 | 0.29  | 0.11 | 1.76            | 0.28            | 0.28 | 0.19 | 0.26             |
| WDK-700-0.5 | 78.35           | 20.09           | 0.33            | 0.25 | 0.24  | 0.17 | 1.56            | 0.31            | 0.47 | 0.16 | 0.06             |
| WDK-700-1   | 85.3            | 12.93           | 0.18            | 0.34 | 0.29  | 0.19 | 1.77            | 0.14            | 0.40 | 0.32 | 0.14             |
| WDK-700-1.5 | 85.95           | 12.62           | 0.17            | 0.29 | 0.34  | 0.20 | 1.43            | 0.23            | 0.33 | 0.27 | 0.17             |
| WDK-700-2   | 82.93           | 15.68           | 0.20            | 0.32 | 0.31  | 0.17 | 1.40            | 0.22            | 0.32 | 0.28 | 0.18             |
| WDK-600-1   | 79.41           | 19.1            | 0.25            | 0.33 | 0.31  | 0.12 | 1.49            | 0.28            | 0.31 | 0.28 | 0.13             |
| WDK-800-1   | 89.9            | 7.89            | 0.16            | 0.30 | 0.32  | 0.21 | 2.21            | 0.16            | 0.40 | 0.28 | 0.16             |

**Table S2.** Comparison of electrochemical performances of the carbon materials synthesized from biomass in supercapacitors.

| Materials            | Surface area<br>[m <sup>2</sup> g <sup>-1</sup> ] | Electrolyte                    | Capacitance<br>[F g <sup>-1</sup> ] | E<br>[Wh kg <sup>-1</sup> ] | P<br>[kW kg <sup>-1</sup> ] | Reference  |
|----------------------|---------------------------------------------------|--------------------------------|-------------------------------------|-----------------------------|-----------------------------|------------|
| Walnut peel          | 2495.4                                            | H <sub>2</sub> SO <sub>4</sub> | 557.9 <sup>a; b</sup>               | 12.4                        | 5.7                         | This study |
| Cellulose            | 859                                               | H <sub>2</sub> SO <sub>4</sub> | 328 <sup>a; c</sup>                 | –                           | –                           | [9]        |
| Cotton               | 2436                                              | KOH                            | 283 <sup>a; b</sup>                 | –                           | –                           | [10]       |
| Coconut Shell        | 2440                                              | H <sub>2</sub> SO <sub>4</sub> | 221.4 <sup>a; g</sup>               | 7.6                         | 4.5                         | [11]       |
| Chitosan             | 1582                                              | KOH                            | 252 <sup>a; c</sup>                 | –                           | –                           | [12]       |
| Bagasse              | 2064                                              | H <sub>2</sub> SO <sub>4</sub> | 142 <sup>a; c</sup>                 | 19.7                        | 0.5                         | [13]       |
| Human Hair           | 1306                                              | KOH                            | 340 <sup>a; b</sup>                 | 45.3                        | 2.2                         | [14]       |
| Rice Husk            | 1768                                              | KOH                            | 233 <sup>a; f</sup>                 | 8.36                        | –                           | [15]       |
| Pomelo Peel          | 2725                                              | KOH                            | 342 <sup>a; e</sup>                 | 9.4                         | 0.1                         | [16]       |
| Waste Air-laid Paper | 1470                                              | KOH                            | 296 <sup>a; c</sup>                 | 34.3                        | 0.3                         | [17]       |
| RF Resins            | 2178                                              | KOH                            | 222 <sup>d; c</sup>                 | 10.1                        | 8.0                         | [18]       |
| Pomelo Peel          | 2191                                              | KOH                            | 342 <sup>a; b</sup>                 | 17.1                        | 3.8                         | [19]       |
| Fungus               | 1103                                              | KOH                            | 360 <sup>a; b</sup>                 | 22.0                        | –                           | [20]       |
| NCAs                 | 1626                                              | KOH                            | 354 <sup>a; e</sup>                 | –                           | –                           | [21]       |
| Duckweeds            | 1636                                              | KOH                            | 315 <sup>a; b</sup>                 | 8.3                         | 0.1                         | [22]       |

<sup>(a)</sup>Capacitance with three-electrode system, <sup>(b)</sup> the current density of 1 A g<sup>-1</sup>, <sup>(c)</sup> the current density of 0.5 A g<sup>-1</sup>,  
<sup>(d)</sup> Capacitance with two-electrode system, <sup>(e)</sup> the current density of 0.2 A g<sup>-1</sup>, <sup>(f)</sup> the current density of 2 A g<sup>-1</sup>,  
<sup>(g)</sup> the current density of 5 A g<sup>-1</sup>.

## Notes and references

- 1 T. Otowa, R. Tanibata, and M. Itoh, *Gas separation & purification*, 1993, **7**, 241-245.
- 2 L. Qie, W. Chen, H. Xu, X. Xiong, Y. Jiang, F. Zou, X. Hu, Y. Xin, Z. Zhang and Y. Huang, *Energy Environ. Sci.*, 2013, **6**, 2497-2504.
- 3 M. Sevilla, A. B. Fuertes and R. Mokaya, *Energy Environ. Sci.*, 2011, **4**, 1400-1410.
- 4 J. Gañan, C. M. González-García, J. F. González, E. Sabio, A. Macías-García and M. A. Díaz-Díez, *Appl. Surf. Sci.*, 2004, **238**, 347-354.
- 5 Y. Sudaryanto, S. B. Hartono, W. Irawaty, H. Hindarso and S. Ismadji, *Bioresource Technol*, 2006, **97**, 734-739.
- 6 X. Wei, H. Zou and S. Gao, *Carbon*, 2017, **123**, 471-480.
- 7 X. Wei, Y. Li and S. Gao, *J. Mater. Chem. A*, 2017, **5**, 181-188.
- 8 H. Zhuo, Y. Hu, X. Tong, L. Zhong, X. Peng and R. Sun, *Ind. Crops Prod.*, 2016, **87**, 229-235.
- 9 P. Cheng, T. Li, H. Yu, L. Zhi, Z. Liu and Z. Lei, *J. Phys. Chem. C*, 2016, **120**, 2079-2086.
- 10 A. Jain, C. Xu, S. Jayaraman, R. Balasubramanian, J. Y. Lee and M. P. Srinivasan, *Microporous Mesoporous Mater.*, 2015, **218**, 55-61.
- 11 X. Deng, B. Zhao, L. Zhu and Z. Shao, *Carbon*, 2015, **93**, 48-58.
- 12 P. Hao, Z. Zhao, J. Tian, H. Li, Y. Sang, G. Yu, H. Cai, H. Liu, C. P. Wong and A. Umar, *Nanoscale*, 2014, **6**, 12120-12129.
- 13 W. Qian, F. Sun, Y. Xu, L. Qiu, C. Liu, S. Wang and F. Yan, *Energy Environ. Sci.*, 2014, **7**, 379-386.
- 14 X. He, P. Ling, M. Yu, X. Wang, X. Zhang and M. Zheng, *Electrochim. Acta*, 2013, **105**, 635-641.
- 15 Q. Liang, L. Ye, Z. H. Huang, Q. Xu, Y. Bai, F. Kang and Q. H. Yang, *Nanoscale*, 2014, **6**, 13831-13837.
- 16 J. Pu, C. Li, L. Tang, T. Li, L. Ling, K. Zhang, Y. Xu, Q. Li and Y. Yao, *Carbon*, 2015, **94**, 650-660.
- 17 H. Xuan, Y. Wang, G. Lin, F. Wang, L. Zhou, X. Dong and Z. Chen, *RSC Adv.*, 2016, **6**, 15313-15319.
- 18 C. Peng, J. Lang, S. Xu and X. Wang, *RSC Adv.*, 2014, **4**, 54662-54667.
- 19 C. Long, X. Chen, L. Jiang, L. Zhi and Z. Fan, *Nano Energy*, 2015, **12**, 141-151.
- 20 J. Zhang, G. Chen, Q. Zhang, F. Kang and B. You, *ACS Appl. Mat. Interfaces*, 2015, **7**, 12760-12766.
- 21 T. Wang, J. Zhang, Q. Hou, and S. Wang, *J. Alloys Compd.*, 2019, **771**, 1009-1017.
